# Supplementary figures and images for: PIAS1 regulates CP2c localization and active promoter complex formation in erythroid cell-specific α-globin expression
Source: PubMed Central journal article supplement — Nucleic Acids Res. 2010 Apr 26;38(16):5456–71. doi: 10.1093/nar/gkq286 (PMC2938217; doi:10.1093/nar/gkq286), 2010-04-26

**A**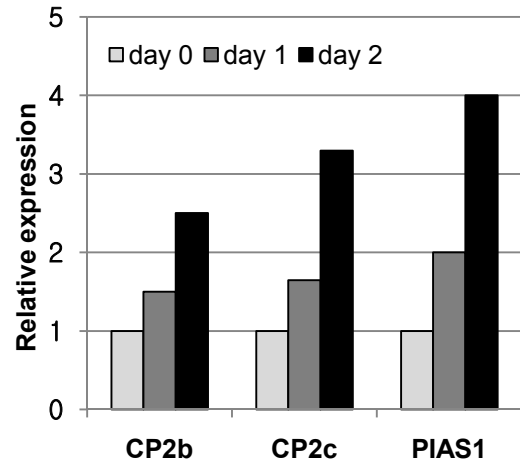**B**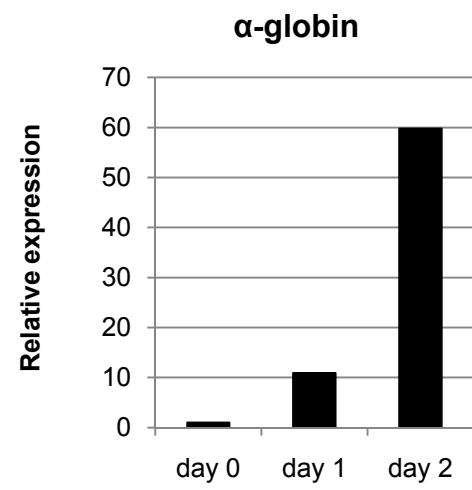

**A**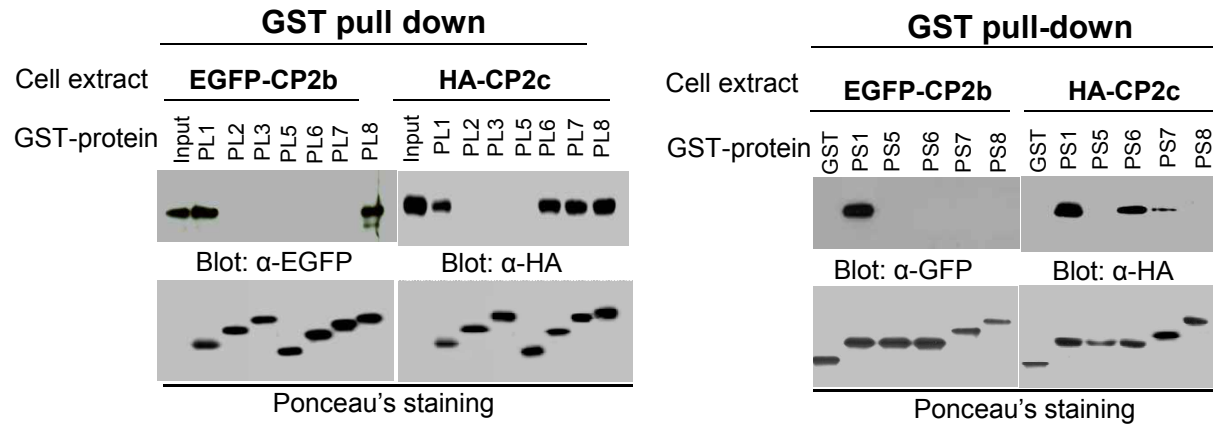**B**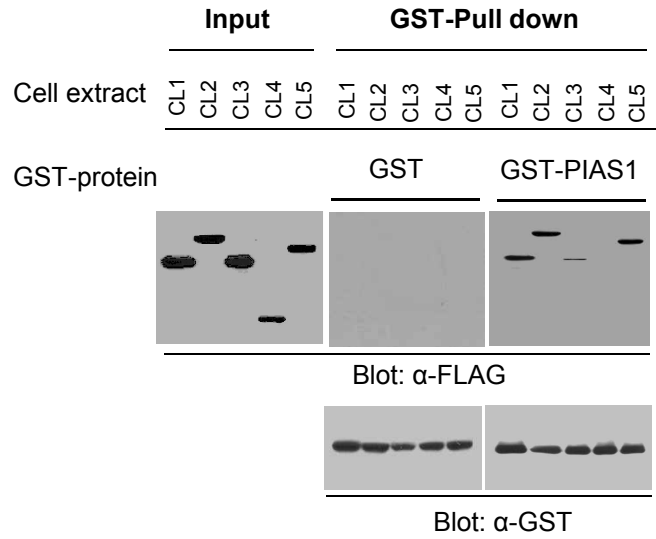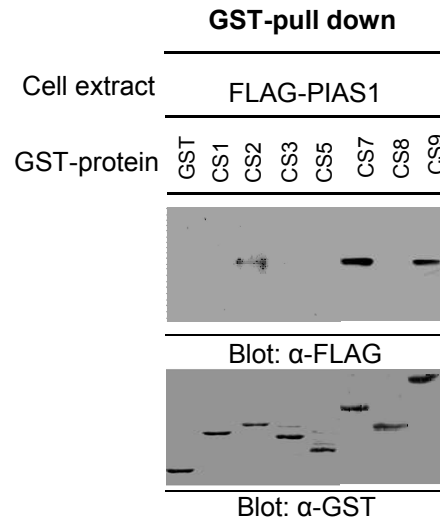**C**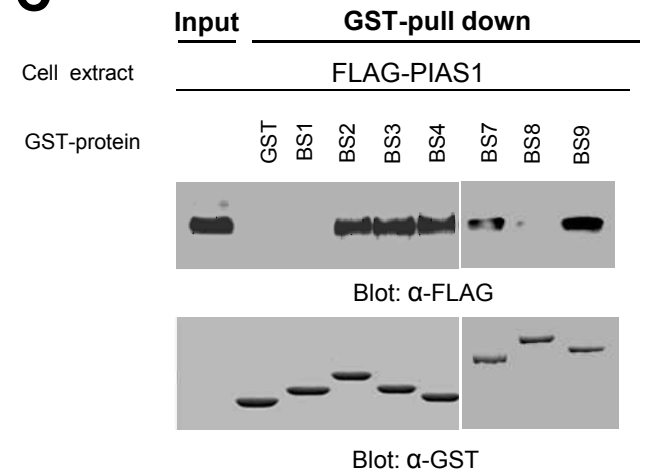

Supplement: supp_gkq286_nar-00485-x-2010-File004.pdf [file supp_gkq286_nar-00485-x-2010-File004.pdf]
